# Supplementary material
Source: PubMed Central journal article supplement (PMC2654711)
Supplement: NIHMS78033-supplement-Alk2_lens_s1.pdf [file NIHMS78033-supplement-Alk2_lens_s1.pdf]

**Table S1.** List of PCR primer sequences used to genotype the *Acvr1*, *Smad4*, *Smad1*, *Smad5* and *Smad2* floxed and deletion alleles, the Cre transgene and their respective product sizes.

| Gene  | Allele   | Primer       | Primer sequence                   | PCR product (bp) |
|-------|----------|--------------|-----------------------------------|------------------|
| Acvr1 | Flox     | Alk2,F       | CCCCCATTGAAGGTTTAGAGAGAC          | Flox: 160 + 90   |
|       | Deletion | Alk2,R2      | CTAAGAGCCATGACAGAGGTTG            |                  |
| Smad1 | Flox     | Alk2 del 5'  | CATGCCCTACTTGGAGACTGG             | WT: 250          |
|       | Deletion | Alk2,R2      | CTAAGAGCCATGACAGAGGTTG            |                  |
| Smad1 | Flox     | Smad1- flox5 | TGCTGTGAGTTCCCATTTGGTTCCAAGCAG    | Flox: 420        |
|       | Deletion | Smad1- flox3 | TCTGCTCCGCCACTCATTCCACCCCAGGAT    |                  |
| Smad2 | Flox     | Smad1 del    | CACCTGTGCCCCCTCCAAGT              | Del: 300         |
|       | Deletion | Smad1B       | GAGCTCTGCTCCGCCACTCA              |                  |
| Smad2 | Flox     | Smad2-fx5.2  | AATGGACACATACCCCCTTCCAACACACAC    | Flox: 640        |
|       | Deletion | Smad2-fx3.2  | TATGTTCTACCTGTTGTGACTGCTAGTGAC    |                  |
| Smad4 | Flox     | Smad2-fx5.2  | AATGGACACATACCCCCTTCCAACACACAC    | WT: 463          |
|       | Deletion | Smad2-del 3' | GCCATCACTCAGGAAGTTCTGTCTTCTGAGCAG |                  |
| Smad4 | Flox     | Smad4_flox5  | TTCAGTGGCTATTGATTTGGGCAGCGTAGC    | Flox: 490        |
|       | Deletion | Smad4_flox3  | AAAGACCGCGTGGTCACTAAGGCACCTGAC    |                  |
| Smad5 | Flox     | Smad4_del    | CTCTTAGTTTTGAGGCGTAAGAGCCACAGG    | WT: 430          |
|       | Deletion | Smad4_flox3  | AAAGACCGCGTGGTCACTAAGGCACCTGAC    |                  |
| Smad5 | Flox     | Smad 5-5     | GAGCGTCTTCCTTAGCTAATGTG           | Flox: 349        |
|       | Deletion | Smad 5-3     | CACTGGCAAAGCAGAGGTTTCAGA          |                  |
| Cre   | Flox     | Smad 5-5     | GAGCGTCTTCCTTAGCTAATGTG           | WT: 235          |
|       | Deletion | Smad 5del    | AAAAATCAGCGCTCGACACG              |                  |
| Cre   | Flox     | Cre-5        | GCATTACCGGTCGATGCAACGAGTGATGAG    | Cre: 408         |
|       | Deletion | Cre-3        | GAGTGAACGAACCTGGTTCGAAATCAGTGCG   |                  |
