# Supplementary material
Source: PubMed Central journal article supplement (PMC2654711)
Supplement: NIHMS78033-supplement-Alk2_lens_s2.pdf [file NIHMS78033-supplement-Alk2_lens_s2.pdf]

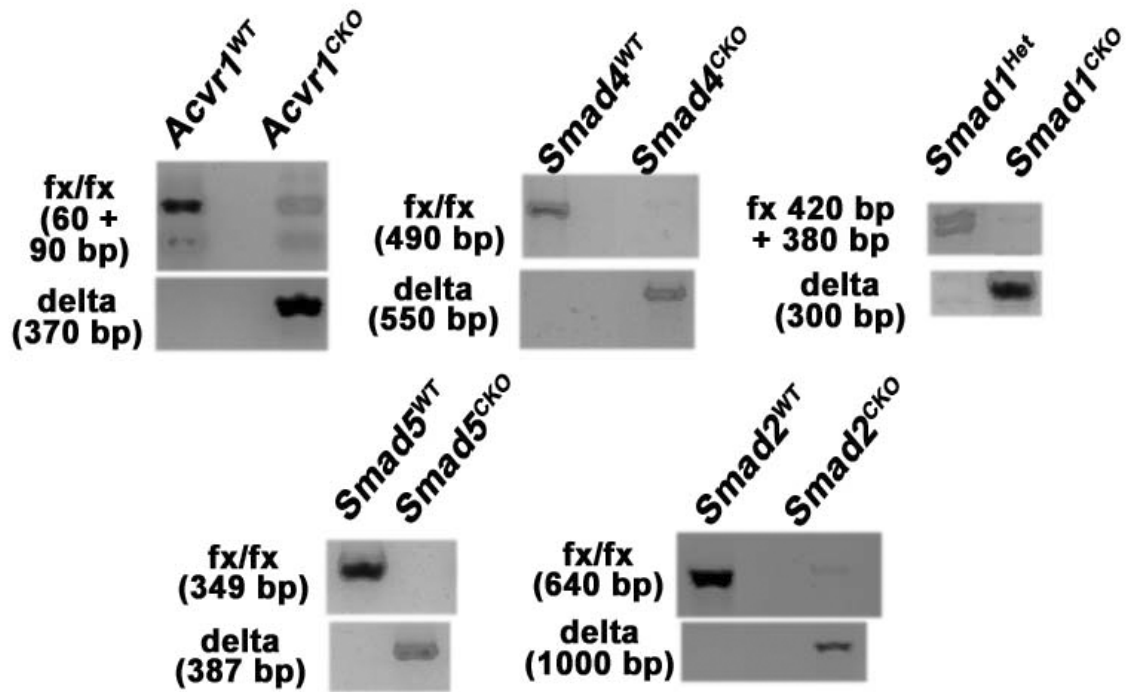

**Supplementary Figure S1.** Genotyping of P3 lenses to show the conversion of the floxed alleles used in this study to deletion alleles by Cre recombinase. WT, absence of Cre; CKO, presence of Cre; fx, floxed allele; +, wild-type allele; het, heterozygote; delta; deletion allele.
